# Supplementary material for: Aroma Compounds in Essential Oils: Analyzing Chemical Composition Using Two-Dimensional Gas Chromatography–High Resolution Time-of-Flight Mass Spectrometry Combined with Chemometrics
Source: MDPI journal article supplement (doi:10.3390/plants12122362), 2023-06-18
Supplement: s1 [file s1]

**Aroma Compounds in Essential Oils: Analyzing Chemical Composition using  
Two-Dimensional Gas Chromatography-High Resolution Time-of-Flight Mass  
Spectrometry Combined with Chemometrics**

Nemanja Koljančić, Olga Vyviurska, Ivan Špánik \*

*Institute of Analytical Chemistry, Faculty of Chemical and Food Technology, Slovak University of  
Technology in Bratislava, Radlinského 9, 812 37 Bratislava, Slovakia*

---

Corresponding author

\*e-mail: [ivan.spanik@stuba.sk](mailto:ivan.spanik@stuba.sk) Tel.: [+421-2-59325277](tel:+421259325277)

**Table S1** 100 features identified with MEGA-DEX DET stationary phase in <sup>1</sup>D as true positives by tile-based F-ratio analysis, along with retention information

| Feature no. | Name                 | Similarity | Probability | CAS        | Quant mass | F-ratio  | Mean <sup>1</sup> tr (sec) | Mean <sup>2</sup> tr(sec) | %RSD <sup>1</sup> tr | %RSD <sup>2</sup> tr |
|-------------|----------------------|------------|-------------|------------|------------|----------|----------------------------|---------------------------|----------------------|----------------------|
| 1           | Geraniol             | 918        | 6674        | 106-24-1   | 69         | 2.64E+15 | 2056                       | 3.36                      | 0                    | 0                    |
| 2           | Phenethyl alcohol    | 940        | 9506        | 60-12-8    | 91         | 5.57E+14 | 1736                       | 3.23                      | 0                    | 4.27E-14             |
| 3           | Nerol                | 940        | 7760        | 106-25-2   | 69         | 5.12E+14 | 1992                       | 3.14                      | 0                    | 0                    |
| 4           | Farnesol             | 929        | 3256        | 3790-71-4  | 69         | 3.98E+14 | 4056                       | 4.11                      | 0                    | 0                    |
| 5           | Citronellol I        | 930        | 5264        | 106-22-9   | 69         | 3.81E+14 | 1912                       | 3.32                      | 0                    | 0                    |
| 6           | Phenylethyl tiglate  | 946        | 9502        | 55719-85-2 | 104        | 1.90E+14 | 3392                       | 6.06                      | 0                    | 3.03E-14             |
| 7           | β-Eudesmol I         | 896        | 6331        | 473-15-4   | 59         | 1.72E+14 | 3624                       | 5.26                      | 0                    | 0                    |
| 8           | Citronellyl formate  | 956        | 6287        | 105-85-1   | 69         | 1.65E+14 | 1840                       | 3.76                      | 0                    | 3.67E-14             |
| 9           | epi-γ-Eudesmol       | 919        | 5835        | 1209-71-8  | 189        | 1.61E+14 | 3448                       | 5.32                      | 0                    | 3.46E-14             |
| 10          | β-Myrcene            | 852        | 2616        | 123-35-3   | 69         | 1.56E+14 | 2008                       | 4.15                      | 0                    | 2.22E-14             |
| 11          | Geranial             | 914        | 8798        | 141-27-5   | 69         | 1.50E+14 | 1912                       | 4.69                      | 0                    | 1.96E-14             |
| 12          | Isomenthone I        | 951        | 5497        | 491-07-6   | 112        | 1.06E+14 | 1352                       | 3.77                      | 0                    | 3.66E-14             |
| 13          | Citronellol II       | 850        | 3500        | 106-22-9   | 81         | 1.05E+14 | 1976                       | 2.95                      | 0                    | 1.56E-14             |
| 14          | Geranyl acetate      | 889        | 3238        | 141-12-8   | 69         | 9.83E+13 | 2376                       | 4.46                      | 0                    | 0                    |
| 15          | n-Hexadecanoic acid  | 850        | 5332        | 57-10-3    | 57         | 9.79E+13 | 5192                       | 3.23                      | 0                    | 4.27E-14             |
| 16          | Geranyl tiglate      | 894        | 7374        | 7785-33-3  | 69         | 9.72E+13 | 3776                       | 5.00                      | 0                    | 0                    |
| 17          | γ-Eudesmol           | 917        | 5857        | 1209-71-8  | 189        | 9.29E+13 | 3536                       | 4.92                      | 0                    | 1.87E-14             |
| 18          | Linalool             | 944        | 8299        | 78-70-6    | 71         | 8.53E+13 | 1224                       | 2.77                      | 0                    | 3.32E-14             |
| 19          | Isomenthone II       | 946        | 5312        | 491-07-6   | 112        | 7.89E+13 | 1448                       | 3.88                      | 0                    | 2.37E-14             |
| 20          | Calamenene           | 817        | 9142        | 73209-42-4 | 159        | 7.82E+13 | 2936                       | 5.00                      | 0                    | 0                    |
| 21          | Methyl geranate      | 881        | 7536        | 2349-14-6  | 69         | 7.72E+13 | 2104                       | 4.32                      | 0                    | 2.13E-14             |
| 22          | Citronellyl butyrate | 968        | 6355        | 141-16-2   | 81         | 7.47E+13 | 2944                       | 4.15                      | 0                    | 2.22E-14             |
| 23          | Geranic acid         | 964        | 7856        | 4698-08-2  | 69         | 7.20E+13 | 2960                       | 2.93                      | 0                    | 0                    |
| 24          | Phenethyl acetate    | 933        | 8575        | 103-45-7   | 104        | 5.78E+13 | 1912                       | 5.20                      | 0                    | 1.77E-14             |
| 25          | Terpinen-4-ol        | 925        | 6976        | 562-74-3   | 71         | 5.42E+13 | 1552                       | 3.48                      | 0                    | 3.96E-14             |
| 26          | Neryl propionate     | 902        | 3165        | 105-91-9   | 69         | 4.49E+13 | 2768                       | 4.50                      | 0                    | 0                    |
| 27          | Eugenol              | 950        | 6575        | 97-53-0    | 164        | 3.94E+13 | 2488                       | 4.97                      | 0                    | 0                    |
| 28          | α-Terpineol I        | 939        | 8177        | 98-55-5    | 59         | 3.24E+13 | 1672                       | 3.55                      | 0                    | 2.59E-14             |

|    |                                 |     |      |            |     |          |      |      |   |          |
|----|---------------------------------|-----|------|------------|-----|----------|------|------|---|----------|
| 29 | δ-Cadinene                      | 941 | 6240 | 16729-01-4 | 161 | 3.06E+13 | 2920 | 4.44 | 0 | 2.07E-14 |
| 30 | Myrcene                         | 943 | 7664 | 123-35-3   | 93  | 2.94E+13 | 720  | 2.01 | 0 | 4.57E-14 |
| 31 | α-Terpineol II                  | 929 | 7965 | 98-55-5    | 59  | 2.41E+13 | 1696 | 3.47 | 0 | 2.65E-14 |
| 32 | α-Pinene                        | 937 | 6100 | 80-56-8    | 93  | 2.33E+13 | 624  | 5.97 | 0 | 0        |
| 33 | Geranyl isobutyrate             | 873 | 2395 | 105-91-9   | 69  | 2.09E+13 | 3136 | 4.50 | 0 | 0        |
| 34 | Methyleugenol                   | 935 | 8209 | 93-15-2    | 178 | 1.96E+13 | 2608 | 5.97 | 0 | 0        |
| 35 | Rose oxide I                    | 884 | 9543 | 16409-43-1 | 139 | 1.93E+13 | 1152 | 3.08 | 0 | 2.98E-14 |
| 36 | Rose oxide II                   | 893 | 9230 | 16409-43-1 | 139 | 1.88E+13 | 1184 | 2.95 | 0 | 1.56E-14 |
| 37 | Rose oxide III                  | 879 | 9519 | 16409-43-1 | 69  | 1.45E+13 | 1256 | 3.11 | 0 | 0        |
| 38 | Ledene                          | 912 | 2770 | 21747-46-6 | 105 | 1.39E+13 | 2792 | 4.27 | 0 | 4.31E-14 |
| 39 | 2-Phenylethyl 2-methylbutanoate | 962 | 7808 | 24817-51-4 | 104 | 1.34E+13 | 2880 | 5.30 | 0 | 1.73E-14 |
| 40 | n-Hexanol                       | 879 | 7483 | 111-27-3   | 56  | 1.32E+13 | 664  | 1.53 | 0 | 1.50E-14 |
| 41 | Hexadecanal                     | 938 | 2517 | 629-80-1   | 55  | 1.28E+13 | 4160 | 4.22 | 0 | 0        |
| 42 | Citronellyl tiglate             | 938 | 6744 | 24717-85-9 | 81  | 1.28E+13 | 3576 | 4.56 | 0 | 2.02E-14 |
| 43 | α-Calacorene                    | 944 | 8997 | 21391-99-1 | 157 | 1.22E+13 | 3056 | 5.26 | 0 | 0        |
| 44 | Caryophyllene                   | 963 | 5634 | 13877-93-5 | 93  | 1.2E+13  | 2424 | 4.24 | 0 | 2.17E-14 |
| 45 | Germacrene D                    | 930 | 6150 | 23986-74-5 | 161 | 1.15E+13 | 2728 | 4.34 | 0 | 4.24E-14 |
| 46 | Neryl butyrate                  | 891 | 4900 | 2345-26-8  | 93  | 1.12E+13 | 2904 | 4.35 | 0 | 2.11E-14 |
| 47 | β-Bisabolene                    | 845 | 1151 | 495-61-4   | 69  | 1.02E+13 | 3960 | 4.00 | 0 | 0        |
| 48 | Citronellyl isohexanoate        | 927 | 3353 | 71662-18-5 | 81  | 9.28E+12 | 3600 | 4.17 | 0 | 2.20E-14 |
| 49 | Aristolene                      | 893 | 1037 | 134-28-1   | 105 | 8.89E+12 | 3568 | 5.06 | 0 | 1.82E-14 |
| 50 | Levandulyl acetate              | 943 | 5577 | 25905-14-0 | 69  | 8.51E+12 | 1880 | 4.00 | 0 | 0        |
| 51 | Citronellyl propionate          | 952 | 5959 | 141-14-0   | 69  | 8.33E+12 | 2568 | 4.11 | 0 | 0        |
| 52 | α-Linolenic acid                | 846 | 2617 | 463-40-1   | 55  | 7.49E+12 | 5808 | 4.35 | 0 | 2.11E-14 |
| 53 | Geranyl propionate              | 845 | 3239 | 105-90-8   | 69  | 7.41E+12 | 3288 | 4.39 | 0 | 0        |
| 54 | β-Bourbonene II                 | 916 | 9557 | 5208-59-3  | 81  | 7.38E+12 | 2232 | 3.83 | 0 | 3.60E-14 |
| 55 | Farnesal                        | 911 | 8744 | 502-67-0   | 69  | 6.41E+12 | 3944 | 5.27 | 0 | 3.49E-14 |
| 56 | Neryl hexanoate                 | 888 | 2047 | 68310-59-8 | 69  | 6.41E+12 | 3792 | 4.50 | 0 | 0        |
| 57 | Widdrol hydroxyether            | 745 | 4393 | 29620-91-5 | 43  | 5.96E+12 | 3656 | 5.28 | 0 | 0        |
| 58 | Junenol                         | 927 | 5075 | 472-07-1   | 109 | 5.94E+12 | 3384 | 5.07 | 0 | 3.63E-14 |
| 59 | α-Farnesene                     | 951 | 6798 | 502-61-4   | 93  | 5.72E+12 | 2840 | 4.02 | 0 | 4.57E-14 |
| 60 | β-Dihydroagarafuran             | 881 | 8603 | 5956-09-2  | 137 | 5.71E+12 | 2808 | 4.77 | 0 | 3.85E-14 |

|    |                         |     |      |             |     |          |      |      |   |          |
|----|-------------------------|-----|------|-------------|-----|----------|------|------|---|----------|
| 61 | Nonanal                 | 928 | 8286 | 124-19-6    | 57  | 5.55E+12 | 1128 | 3.12 | 0 | 1.47E-14 |
| 62 | $\beta$ -Bourbonene III | 914 | 8727 | 119903-95-6 | 81  | 5.37E+12 | 3048 | 4.59 | 0 | 4.01E-14 |
| 63 | Epicubenol              | 926 | 5038 | 19912-67-5  | 161 | 5.29E+12 | 3400 | 4.84 | 0 | 3.80E-14 |
| 64 | $\alpha$ -Humulene      | 919 | 7126 | 6753-98-6   | 93  | 5.07E+12 | 2592 | 4.26 | 0 | 2.16E-14 |
| 65 | Guaiol                  | 904 | 4582 | 220766-71-2 | 107 | 4.84E+12 | 3328 | 4.72 | 0 | 0        |
| 66 | $\beta$ -Eudesmol II    | 860 | 4837 | 473-15-4    | 105 | 4.60E+12 | 3632 | 5.04 | 0 | 1.82E-14 |
| 67 | Benzyl Benzoate         | 939 | 9813 | 120-51-4    | 105 | 4.29E+12 | 4184 | 7.48 | 0 | 3.69E-14 |
| 68 | $\alpha$ -Agarofuran    | 964 | 9086 | 5956-12-7   | 82  | 4.17E+12 | 3072 | 5.30 | 0 | 1.73E-14 |
| 69 | Geranyl hexanoate       | 899 | 3980 | 68310-59-8  | 69  | 3.71E+12 | 3944 | 4.59 | 0 | 4.01E-14 |
| 70 | Spathulenol I           | 849 | 1377 | 72203-24-8  | 93  | 3.64E+12 | 2888 | 4.75 | 0 | 0        |
| 71 | Phenethyl benzoate      | 959 | 9132 | 94-47-3     | 104 | 3.61E+12 | 4536 | 7.44 | 0 | 2.47E-14 |
| 72 | $\alpha$ -epi-Cadinol   | 950 | 5593 | 19912-62-0  | 95  | 3.28E+12 | 3592 | 4.86 | 0 | 0        |
| 73 | $\delta$ -Guaiene       | 932 | 5570 | 3691-11-0   | 93  | 3.27E+12 | 2824 | 4.32 | 0 | 2.13E-14 |
| 74 | Tetradecyl octanoate    | 867 | 5197 | 16456-36-3  | 55  | 2.97E+12 | 6152 | 5.86 | 0 | 0        |
| 75 | 2-Phenylethyl geranoate | 900 | 9433 | /           | 105 | 2.71E+12 | 5256 | 6.48 | 0 | 4.26E-14 |
| 76 | $\alpha$ -Guaiene       | 947 | 5067 | 3691-12-1   | 105 | 2.69E+12 | 2464 | 4.00 | 0 | 0        |
| 77 | Squalene                | 836 | 4038 | 111-02-4    | 81  | 2.67E+12 | 4968 | 4.94 | 0 | 1.86E-14 |
| 78 | Citronellyl valerate    | 910 | 5987 | 7540-53-6   | 81  | 2.66E+12 | 3360 | 4.19 | 0 | 2.19E-14 |
| 79 | Guaia-6,9-diene I       | 952 | 3079 | 37839-64-8  | 105 | 2.49E+12 | 2504 | 4.15 | 0 | 2.22E-14 |
| 80 | Neral                   | 925 | 7261 | 106-26-3    | 41  | 2.43E+12 | 1792 | 4.43 | 0 | 2.08E-14 |
| 81 | Neryl acetate           | 871 | 3545 | 141-12-8    | 69  | 2.32E+12 | 2256 | 4.33 | 0 | 2.12E-14 |
| 82 | $\gamma$ -Murolene      | 937 | 4290 | 30021-74-0  | 161 | 2.32E+12 | 2672 | 4.35 | 0 | 2.11E-14 |
| 83 | Phenethyl propionate    | 954 | 8324 | 122-70-3    | 104 | 2.22E+12 | 2328 | 5.31 | 0 | 1.73E-14 |
| 84 | Nerolidol               | 940 | 4073 | 40716-66-3  | 69  | 1.90E+12 | 3200 | 4.06 | 0 | 2.26E-14 |
| 85 | Dihydromyrcenol         | 897 | 8402 | 18479-58-8  | 59  | 1.86E+12 | 2840 | 3.12 | 0 | 1.47E-14 |
| 86 | Guaia-6,9-diene II      | 903 | 1048 | 36577-33-0  | 91  | 1.63E+12 | 2528 | 4.27 | 0 | 4.31E-14 |
| 87 | Drim-8(12)-ene II       | 841 | 5810 | 168113-16-4 | 95  | 1.60E+12 | 5768 | 5.70 | 0 | 3.23E-14 |
| 88 | Caryophyllene oxide     | 901 | 5746 | 1139-30-6   | 79  | 1.50E+12 | 3232 | 5.31 | 0 | 1.73E-14 |
| 89 | $\gamma$ -Cadiene       | 926 | 3202 | 39029-41-9  | 161 | 1.39E+12 | 2856 | 4.56 | 0 | 2.02E-14 |
| 90 | Norbourbonone           | 921 | 9050 | 13844-03-6  | 81  | 1.37E+12 | 3184 | 5.70 | 0 | 3.23E-14 |
| 91 | $\alpha$ -Copaen-11-ol  | 870 | 728  | 25246-27-9  | 59  | 1.36E+12 | 3704 | 5.37 | 0 | 0        |
| 92 | $\beta$ -Farnesene      | 930 | 6687 | 18794-84-8  | 69  | 1.35E+12 | 2584 | 3.82 | 0 | 0        |

|     |                       |     |      |             |     |          |      |      |   |          |
|-----|-----------------------|-----|------|-------------|-----|----------|------|------|---|----------|
| 93  | $\beta$ -Bourbonene I | 888 | 9509 | 119903-95-6 | 80  | 1.20E+12 | 2200 | 3.60 | 0 | 2.55E-14 |
| 94  | Aromandendrene        | 916 | 2211 | 489-39-4    | 91  | 1.17E+12 | 2616 | 4.25 | 0 | 0        |
| 95  | Spathulenol II        | 806 | 3438 | 77171-55-2  | 105 | 1.13E+12 | 3248 | 5.01 | 0 | 0        |
| 96  | Globulol              | 932 | 3693 | 489-41-8    | 69  | 1.08E+12 | 3304 | 4.69 | 0 | 1.96E-14 |
| 97  | Farnesyl acetone      | 833 | 2884 | 1117-52-8   | 69  | 1.07E+12 | 4608 | 4.96 | 0 | 1.85E-14 |
| 98  | Drim-8(12)-ene I      | 848 | 5647 | 168113-16-4 | 95  | 1.07E+12 | 5160 | 5.58 | 0 | 1.65E-14 |
| 99  | Phenylacetaldehyde    | 923 | 8272 | 122-78-1    | 91  | 9.49E+11 | 1096 | 3.95 | 0 | 2.33E-14 |
| 100 | para-Cymene           | 924 | 6804 | 99-87-6     | 119 | 7.81E+11 | 856  | 2.53 | 0 | 1.82E-14 |

**Table S2** 100 features identified with Rt- $\beta$ DEXsp stationary phase in  $^1$ D as true positives by tile-based F-ratio analysis, along with retention information

| Feature no. | Name                    | Similarity | Probability | CAS        | Quant mass | F-ratio  | Mean $^1$ tr (sec) | Mean $^2$ tr(sec) | %RSD $^1$ tr | %RSD $^2$ tr |
|-------------|-------------------------|------------|-------------|------------|------------|----------|--------------------|-------------------|--------------|--------------|
| 1           | Phenylethyl tiglate     | 939        | 9315        | 55719-85-2 | 104        | 4.10E+14 | 4026               | 3.69              | 0            | 2.49E-14     |
| 2           | Citronellyl formate II  | 957        | 6814        | 105-85-1   | 69         | 2.51E+14 | 2436               | 2.46              | 0            | 1.87E-14     |
| 3           | Menthone                | 941        | 5088        | 10458-14-7 | 112        | 2.37E+14 | 1980               | 2.67              | 0            | 3.44E-14     |
| 4           | Geranyl formate         | 894        | 3786        | 105-86-2   | 69         | 2.19E+14 | 2586               | 2.69              | 0            | 0            |
| 5           | Linalool I              | 927        | 8248        | 78-70-6    | 71         | 1.04E+14 | 1764               | 2.00              | 0            | 0            |
| 6           | Linalool II             | 947        | 8768        | 78-70-6    | 71         | 9.58E+13 | 1806               | 1.96              | 0            | 3.52E-14     |
| 7           | epi- $\gamma$ -Eudesmol | 900        | 5773        | 1209-71-8  | 189        | 9.26E+13 | 4026               | 3.43              | 0            | 0            |
| 8           | Phenethyl alcohol       | 939        | 9603        | 60-12-8    | 91         | 8.99E+13 | 2298               | 2.27              | 0            | 0            |
| 9           | Farnesol                | 923        | 4184        | 4602-84-0  | 69         | 8.15E+13 | 4614               | 2.85              | 0            | 3.23E-14     |
| 10          | Linalyl acetate         | 915        | 6168        | 115-95-7   | 93         | 7.13E+13 | 2244               | 2.52              | 0            | 1.82E-14     |
| 11          | Geranyl tiglate         | 916        | 8321        | 7785-33-3  | 69         | 7.08E+13 | 4350               | 3.25              | 0            | 0            |
| 12          | Germacrene D            | 927        | 5631        | 23986-74-5 | 161        | 7.08E+13 | 3186               | 3.18              | 0            | 0            |
| 13          | Geraniol                | 944        | 6910        | 106-24-1   | 69         | 6.11E+13 | 2628               | 2.51              | 0            | 3.66E-14     |
| 14          | $\beta$ -Eudesmol I     | 909        | 6962        | 473-15-4   | 59         | 5.90E+13 | 4272               | 3.43              | 0            | 0            |
| 15          | Citronellyl formate I   | 875        | 4621        | 105-85-1   | 69         | 5.13E+13 | 2424               | 2.70              | 0            | 1.70E-14     |
| 16          | Calamenene              | 805        | 9160        | 73209-42-4 | 159        | 5.09E+13 | 3438               | 3.45              | 0            | 2.66E-14     |
| 17          | Citronellol             | 883        | 4585        | 106-22-9   | 81         | 4.11E+13 | 2508               | 2.18              | 0            | 0            |
| 18          | Geranyl acetate         | 896        | 3372        | 141-12-8   | 69         | 4.03E+13 | 2928               | 2.92              | 0            | 3.15E-14     |

|    |                                 |     |      |            |     |          |      |      |   |          |
|----|---------------------------------|-----|------|------------|-----|----------|------|------|---|----------|
| 19 | 3,7-Dimethyl-1,7-octanediol     | 908 | 6756 | 107-74-4   | 59  | 3.99E+13 | 3456 | 2.16 | 0 | 2.13E-14 |
| 20 | $\beta$ -Phenylethyl butyrate   | 957 | 6877 | 103-52-6   | 104 | 3.88E+13 | 3096 | 3.20 | 0 | 1.44E-14 |
| 21 | $\beta$ -Eudesmol II            | 909 | 8882 | 473-15-4   | 59  | 3.69E+13 | 4284 | 3.32 | 0 | 0        |
| 22 | Geranyl propanoate              | 912 | 3017 | 105-90-8   | 69  | 3.54E+13 | 3318 | 2.96 | 0 | 1.55E-14 |
| 23 | Viridiflorene                   | 921 | 2465 | 74409-93-1 | 105 | 2.80E+13 | 3204 | 3.17 | 0 | 2.90E-14 |
| 24 | Geraniol butyrate               | 898 | 3961 | 106-29-6   | 69  | 2.74E+13 | 3702 | 3.06 | 0 | 1.50E-14 |
| 25 | $\alpha$ -Terpineol             | 942 | 8402 | 98-55-5    | 59  | 2.74E+13 | 2328 | 2.29 | 0 | 2.01E-14 |
| 26 | Nerol                           | 860 | 6793 | 106-25-2   | 69  | 2.28E+13 | 2472 | 2.32 | 0 | 0        |
| 27 | Valerianol                      | 933 | 5748 | 20489-45-6 | 161 | 2.26E+13 | 4254 | 3.29 | 0 | 1.40E-14 |
| 28 | $\delta$ -Cadinene              | 940 | 5679 | 16729-01-4 | 161 | 1.87E+13 | 3360 | 3.26 | 0 | 4.23E-14 |
| 29 | $\alpha$ -Muurolene             | 914 | 961  | 10208-80-7 | 105 | 1.80E+13 | 3228 | 3.22 | 0 | 2.86E-14 |
| 30 | Methyleugenol                   | 922 | 8223 | 93-15-2    | 178 | 1.78E+13 | 3240 | 3.48 | 0 | 3.96E-14 |
| 31 | Geranial                        | 904 | 9014 | 141-27-5   | 69  | 1.74E+13 | 2658 | 2.61 | 0 | 0        |
| 32 | Phenethyl propionate            | 949 | 5588 | 122-70-3   | 104 | 1.66E+13 | 2946 | 3.24 | 0 | 4.26E-14 |
| 33 | Citronellyl tiglate             | 938 | 7369 | 24717-85-9 | 95  | 1.58E+13 | 4176 | 2.95 | 0 | 1.56E-14 |
| 34 | Neryl hexanoate                 | 899 | 2951 | 68310-59-8 | 69  | 1.27E+13 | 4362 | 2.98 | 0 | 3.09E-14 |
| 35 | Aristolene                      | 851 | 1398 | 6831-16-9  | 105 | 1.11E+13 | 4224 | 3.23 | 0 | 4.27E-14 |
| 36 | Citronellyl propionate          | 942 | 5627 | 141-14-0   | 81  | 1.07E+13 | 3144 | 2.67 | 0 | 3.44E-14 |
| 37 | 2-Phenylethyl 2-methylbutanoate | 970 | 8213 | 24817-51-4 | 104 | 1.07E+13 | 3504 | 3.26 | 0 | 4.23E-14 |
| 38 | Rose oxide I                    | 900 | 9554 | 16409-43-1 | 139 | 1.03E+13 | 1596 | 2.28 | 0 | 2.02E-14 |
| 39 | 1,2-Hexadecene epoxide          | 873 | 1867 | 7320-37-8  | 57  | 9.78E+12 | 6318 | 3.33 | 0 | 4.14E-14 |
| 40 | Eugenol                         | 940 | 6054 | 97-53-0    | 164 | 9.52E+12 | 3156 | 3.00 | 0 | 0        |
| 41 | Cogeijerene                     | 908 | 2453 | 5988-83-0  | 147 | 8.88E+12 | 4224 | 3.36 | 0 | 0        |
| 42 | Citronellyl isohexanoate        | 933 | 4070 | 71662-18-5 | 81  | 7.09E+12 | 4200 | 2.72 | 0 | 3.38E-14 |
| 43 | Batilol                         | 738 | 1199 | 544-62-7   | 57  | 6.76E+12 | 6414 | 3.20 | 0 | 1.44E-14 |
| 44 | Neral                           | 917 | 7158 | 106-26-3   | 69  | 6.40E+12 | 2472 | 2.62 | 0 | 0        |
| 45 | $\alpha$ -epi-Muurolol          | 909 | 6241 | 19912-62-0 | 95  | 6.01E+12 | 4182 | 3.24 | 0 | 4.26E-14 |
| 46 | Caryophyllene                   | 959 | 5470 | 13877-93-5 | 93  | 5.98E+12 | 2862 | 3.01 | 0 | 3.05E-14 |
| 47 | Citronellyl acetate             | 923 | 4231 | 150-84-5   | 81  | 5.54E+12 | 2754 | 2.60 | 0 | 1.77E-14 |
| 48 | $\beta$ -Farnesene              | 937 | 7187 | 18794-84-8 | 93  | 5.32E+12 | 3060 | 2.72 | 0 | 3.38E-14 |

|    |                                       |     |      |             |     |          |      |      |   |          |
|----|---------------------------------------|-----|------|-------------|-----|----------|------|------|---|----------|
| 49 | Citronellyl butyrate                  | 968 | 6181 | 141-16-2    | 81  | 4.94E+12 | 3528 | 2.78 | 0 | 3.31E-14 |
| 50 | $\gamma$ -Eudesmol                    | 916 | 5594 | 1209-71-8   | 189 | 4.24E+12 | 4152 | 3.28 | 0 | 2.80E-14 |
| 51 | Guaia-6,9-diene                       | 943 | 2942 | 37839-64-8  | 105 | 4.07E+12 | 2922 | 3.11 | 0 | 0        |
| 52 | Lavandulyl 2-methyl butanoate         | 919 | 3425 | 17609-96-0  | 69  | 4.05E+12 | 3846 | 2.91 | 0 | 3.16E-14 |
| 53 | 10-Nonadecanone                       | 787 | 6043 | 504-57-4    | 57  | 3.95E+12 | 5028 | 2.65 | 0 | 1.73E-14 |
| 54 | Junenol                               | 913 | 5805 | 472-07-1    | 109 | 3.62E+12 | 3984 | 3.37 | 0 | 2.73E-14 |
| 55 | Spathulenol                           | 943 | 5262 | 72203-24-8  | 43  | 3.57E+12 | 3942 | 3.15 | 0 | 2.92E-14 |
| 56 | Norbourbonone                         | 898 | 9361 | 13844-03-6  | 81  | 3.25E+12 | 3882 | 3.41 | 0 | 2.70E-14 |
| 57 | Geranic acid                          | 958 | 7900 | 4698-08-2   | 69  | 3.01E+12 | 3570 | 1.94 | 0 | 2.37E-14 |
| 58 | $\alpha$ -Agarofuran                  | 967 | 9209 | 5956-12-7   | 82  | 2.99E+12 | 3576 | 3.69 | 0 | 2.49E-14 |
| 59 | Epicubenol                            | 927 | 5901 | 19912-67-5  | 161 | 2.71E+12 | 3972 | 3.25 | 0 | 0        |
| 60 | $\delta$ -Cadinol                     | 916 | 3122 | 19435-97-3  | 119 | 2.68E+12 | 4206 | 3.26 | 0 | 4.23E-14 |
| 61 | p-Mentha-1,5-dien-8-ol                | 896 | 8805 | 1686-20-0   | 59  | 2.51E+12 | 2388 | 2.40 | 0 | 1.92E-14 |
| 62 | Cubeban-11-ol                         | 904 | 6334 | 220766-71-2 | 107 | 2.21E+12 | 3924 | 3.14 | 0 | 0        |
| 63 | $\gamma$ -Muurolene                   | 888 | 2179 | 523-47-7    | 105 | 2.12E+12 | 3084 | 3.17 | 0 | 2.90E-14 |
| 64 | 1-Eicosanol                           | 896 | 2292 | 629-96-9    | 57  | 2.09E+12 | 5478 | 2.83 | 0 | 3.25E-14 |
| 65 | Caryophyllene oxide                   | 887 | 5764 | 1139-30-6   | 79  | 2.04E+12 | 3906 | 3.30 | 0 | 2.79E-14 |
| 66 | Ledene                                | 882 | 3925 | 552-02-3    | 81  | 1.86E+12 | 3954 | 3.14 | 0 | 0        |
| 67 | Methyl geranate                       | 867 | 5936 | 1189-09-9   | 69  | 1.77E+12 | 2670 | 2.80 | 0 | 1.64E-14 |
| 68 | 10-epi-Elemol                         | 918 | 4842 | 639-99-6    | 93  | 1.65E+12 | 3822 | 2.84 | 0 | 3.24E-14 |
| 69 | $\alpha$ -Copaen-11-ol                | 838 | 8219 | 41370-56-3  | 59  | 1.63E+12 | 4392 | 3.36 | 0 | 0        |
| 70 | 7 $\alpha$ -Hydroperoxy manool        | 638 | 1051 | 24583-54-8  | 69  | 1.56E+12 | 4896 | 3.08 | 0 | 2.98E-14 |
| 71 | Menthoglycol                          | 903 | 7860 | 92471-23-3  | 81  | 1.38E+12 | 3342 | 2.33 | 0 | 3.95E-14 |
| 72 | Phenylethyl octanoate                 | 907 | 8304 | 5457-70-5   | 104 | 1.35E+12 | 5022 | 3.49 | 0 | 3.95E-14 |
| 73 | Isopulegol                            | 822 | 4183 | 89-79-2     | 67  | 1.32E+12 | 2712 | 2.19 | 0 | 2.10E-14 |
| 74 | $\beta$ -Helmiscapene                 | 936 | 1345 | 17627-30-4  | 133 | 1.25E+12 | 3126 | 3.34 | 0 | 2.75E-14 |
| 75 | $\alpha$ -Copaene                     | 919 | 4866 | 138874-68-7 | 93  | 1.22E+12 | 2568 | 2.84 | 0 | 3.24E-14 |
| 76 | $\alpha$ -Calacorene                  | 922 | 8869 | 21391-99-1  | 157 | 1.22E+12 | 3552 | 3.65 | 0 | 2.52E-14 |
| 77 | <i>n</i> -Dodecenylsuccinic anhydride | 635 | 2314 | 19780-11-1  | 57  | 1.15E+12 | 5124 | 2.62 | 0 | 0        |
| 78 | Rose oxide II                         | 891 | 9568 | 16409-43-1  | 139 | 1.14E+12 | 1656 | 2.39 | 0 | 0        |

|     |                                         |     |      |             |     |          |      |      |   |          |
|-----|-----------------------------------------|-----|------|-------------|-----|----------|------|------|---|----------|
| 79  | neo-Intermedeol                         | 942 | 4507 | 5945-72-2   | 81  | 1.13E+12 | 4296 | 3.33 | 0 | 4.14E-14 |
| 80  | $\alpha$ -Agarofuran                    | 866 | 8626 | 5956-12-7   | 82  | 1.06E+12 | 3264 | 3.56 | 0 | 2.58E-14 |
| 81  | 2-Phenylethyl (Z)-2-methyl-2-butenolate | 903 | 2178 | /           | 104 | 1.05E+12 | 4032 | 4.61 | 0 | 0        |
| 82  | Cadina-1,4-diene                        | 903 | 1798 | 38758-02-0  | 105 | 1.00E+12 | 3426 | 3.28 | 0 | 2.80E-14 |
| 83  | Phytol acetate                          | 807 | 1632 | 10236-16-5  | 95  | 9.83E+11 | 5958 | 3.12 | 0 | 1.47E-14 |
| 84  | $\gamma$ -Muurolene                     | 895 | 1693 | 30021-74-0  | 93  | 8.98E+11 | 3318 | 3.28 | 0 | 2.80E-14 |
| 85  | Spathulenol                             | 797 | 3179 | 77171-55-2  | 105 | 8.96E+11 | 3732 | 3.56 | 0 | 2.58E-14 |
| 86  | Isoledene                               | 868 | 921  | 95910-36-4  | 105 | 8.84E+11 | 2958 | 3.16 | 0 | 2.91E-14 |
| 87  | Lavandulyl 2-methyl butanoate           | 901 | 2186 | 17609-96-0  | 69  | 8.76E+11 | 4116 | 2.98 | 0 | 3.09E-14 |
| 88  | Drim-8(12)-ene                          | 830 | 5656 | 168113-16-4 | 95  | 8.69E+11 | 6336 | 4.57 | 0 | 2.01E-14 |
| 89  | Octadecanal                             | 871 | 1894 | 638-66-4    | 71  | 8.16E+11 | 5604 | 2.83 | 0 | 3.25E-14 |
| 90  | Myrtenyl angelate                       | 880 | 3777 | 138530-45-7 | 91  | 7.87E+11 | 4128 | 3.44 | 0 | 1.34E-14 |
| 91  | Phellandral                             | 889 | 6551 | 21391-98-0  | 81  | 7.87E+11 | 2706 | 2.75 | 0 | 0        |
| 92  | <i>n</i> -Dodecanoic acid               | 722 | 3939 | 143-07-7    | 73  | 7.85E+11 | 6672 | 1.47 | 0 | 1.56E-14 |
| 93  | <i>n</i> -Tridecanal                    | 887 | 2101 | 10486-19-8  | 57  | 7.42E+11 | 4446 | 2.59 | 0 | 3.55E-14 |
| 94  | Menthol                                 | 911 | 2818 | 1490-04-6   | 71  | 7.39E+11 | 2172 | 2.26 | 0 | 4.07E-14 |
| 95  | Elemene                                 | 895 | 3272 | 515-13-9    | 81  | 7.37E+11 | 2730 | 2.77 | 0 | 3.32E-14 |
| 96  | Terpinen-4-ol                           | 910 | 6911 | 562-74-3    | 71  | 7.31E+11 | 2136 | 2.34 | 0 | 1.96E-14 |
| 97  | 14-Methylhexadec-8-enal                 | 790 | 1437 | 60609-53-2  | 81  | 7.21E+11 | 5904 | 3.15 | 0 | 2.92E-14 |
| 98  | $\gamma$ -Elemene                       | 812 | 1551 | 29873-99-2  | 93  | 6.95E+11 | 4428 | 3.59 | 0 | 5.12E-14 |
| 99  | Viridiflorol                            | 887 | 3886 | 19078-39-8  | 109 | 6.88E+11 | 3780 | 3.24 | 0 | 4.26E-14 |
| 100 | Fokienol                                | 888 | 2409 | 33440-00-5  | 55  | 6.84E+11 | 4764 | 3.01 | 0 | 3.05E-14 |

**Table S3** Enantiomeric composition and separation factors of selected chiral terpenes in studied essential oils obtained with column set-up 2

| Feature no. | Compound          | EC, % |        |        |        |        | <i>k</i> |
|-------------|-------------------|-------|--------|--------|--------|--------|----------|
|             |                   | AK3   | IREMK1 | IREMK2 | IREMK4 | IREMK5 |          |
| 1           | Citronellol I     | 71,88 | 74,59  | 72,83  | 75,67  | 66,75  | 1,04     |
| 2           | Citronellol II    | 28,12 | 25,41  | 27,17  | 24,33  | 33,25  |          |
| 3           | Drim-8(12)-ene I  | 31,40 | 43,76  | 26,53  | 26,85  | 70,05  | 1,12     |
| 4           | Drim-8(12)-ene II | 68,60 | 56,24  | 73,47  | 73,15  | 29,95  |          |



|    |                         |       |       |       |       |       |      |
|----|-------------------------|-------|-------|-------|-------|-------|------|
| 5  | Guaia-6,9-diene I       | 29,10 | 51,27 | 44,56 | 60,71 | 46,03 | 1,01 |
| 6  | Guaia-6,9-diene II      | 70,90 | 48,73 | 55,44 | 39,29 | 53,97 |      |
| 7  | Isomenthone I           | 61,98 | 63,15 | 20,16 | 56,96 | 53,59 | 1,08 |
| 8  | Isomenthone II          | 38,02 | 36,85 | 79,84 | 43,04 | 46,41 |      |
| 9  | Rose oxide I            | 55,81 | 48,90 | 41,53 | 35,17 | 41,69 | 1,03 |
| 10 | Rose oxide II           | 1,16  | 1,06  | 1,50  | 1,25  | 36,55 |      |
| 11 | Rose oxide III          | 43,03 | 50,05 | 56,97 | 63,58 | 21,76 | 1,07 |
| 13 | Spathulenol II          | 72,60 | 92,57 | 6,03  | 55,60 | 27,64 |      |
| 12 | Spathulenol I           | 27,40 | 7,43  | 93,97 | 44,40 | 72,36 | 1,89 |
| 14 | $\alpha$ -Terpineol I   | 44,16 | 48,06 | 41,15 | 46,27 | 33,65 |      |
| 15 | $\alpha$ -Terpineol II  | 55,84 | 51,94 | 58,85 | 53,73 | 66,35 | 1,02 |
| 16 | $\beta$ -Bourbonene I   | 8,52  | 37,68 | 20,69 | 23,27 | 16,93 |      |
| 17 | $\beta$ -Bourbonene II  | 90,42 | 51,59 | 41,51 | 48,45 | 43,98 | 1,01 |
| 18 | $\beta$ -Bourbonene III | 1,06  | 10,73 | 37,80 | 28,28 | 39,09 |      |
| 19 | $\beta$ -Eudesmol I     | 57,90 | 74,30 | 63,69 | 73,63 | 53,44 | 1,00 |
| 20 | $\beta$ -Eudesmol II    | 42,10 | 25,70 | 36,31 | 26,37 | 46,56 |      |

**Table S4** Enantiomeric composition and separation factors of selected chiral terpenes in studied essential oils obtained with column set-up 3

| Feature no. | Compound               | EC, % |        |        |        |        | <i>k</i> |
|-------------|------------------------|-------|--------|--------|--------|--------|----------|
|             |                        | AK3   | IREMK1 | IREMK2 | IREMK4 | IREMK5 |          |
| 1           | Citronellyl formate I  | 42,60 | 30,42  | 30,93  | 36,83  | 53,47  | 1,0      |
| 2           | Citronellyl formate II | 57,40 | 69,58  | 69,07  | 63,17  | 46,53  |          |
| 3           | Linalool I             | 32,88 | 45,39  | 29,51  | 34,21  | 47,94  | 1,0      |
| 4           | Linalool II            | 67,12 | 54,61  | 70,49  | 65,79  | 52,06  |          |
| 5           | Rose oxide I           | 65,07 | 66,93  | 64,28  | 63,47  | 76,12  | 1,1      |
| 6           | Rose oxide II          | 34,93 | 33,07  | 35,72  | 36,53  | 23,88  |          |
| 7           | $\beta$ -Eudesmol I    | 69,11 | 59,93  | 74,99  | 54,98  | 64,61  | 1,0      |
| 8           | $\beta$ -Eudesmol II   | 30,89 | 40,07  | 25,01  | 45,02  | 35,39  |          |

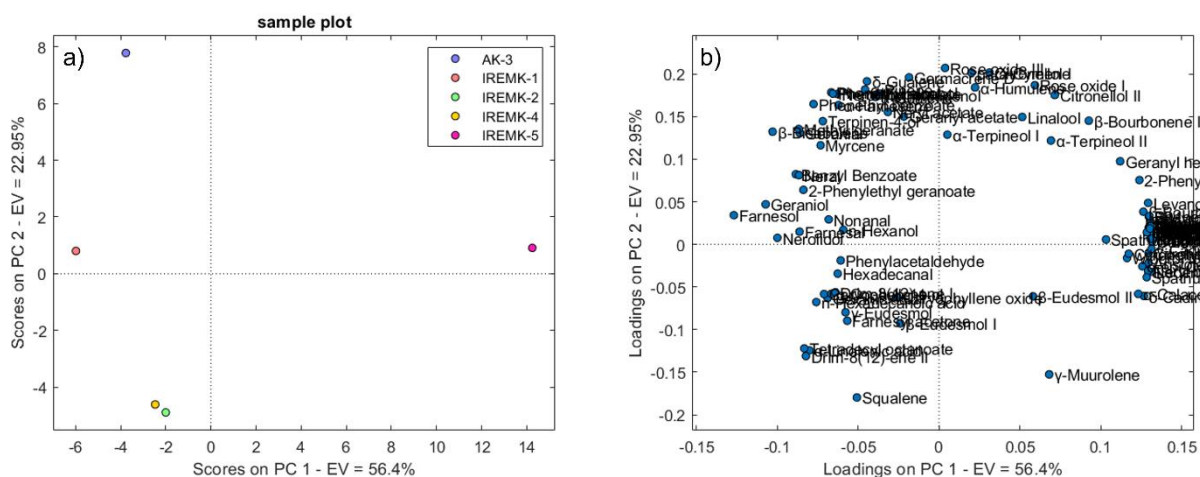

**Figure S1** PCA results - scores a) and loadings b) plots for 100 identified features with indication of discrimination between different essential oils on column set-up 2

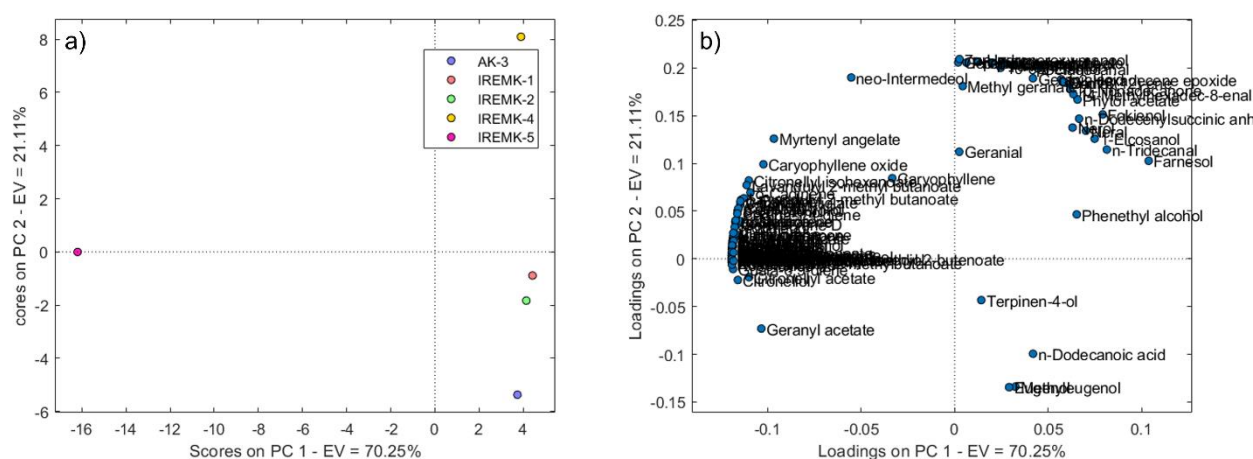

**Figure S2** PCA results - scores a) and loadings b) plots for 100 identified features with indication of discrimination between different essential oils on column set-up 3

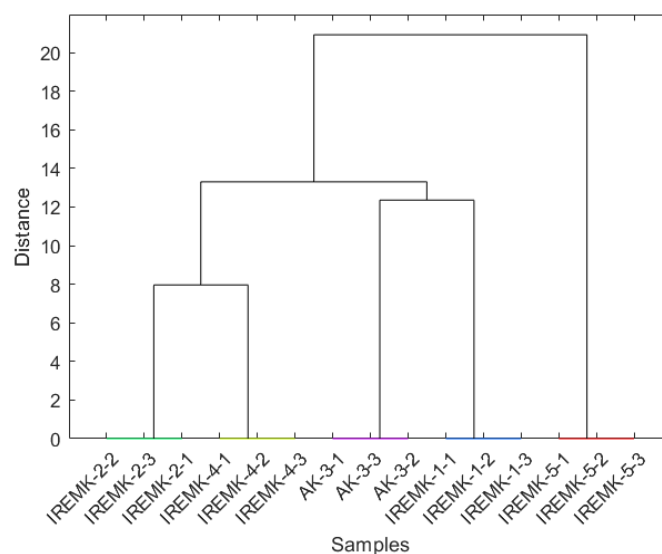

**Figure S3** Dendrogram obtained for the reduced feature set obtained on column set-up 2

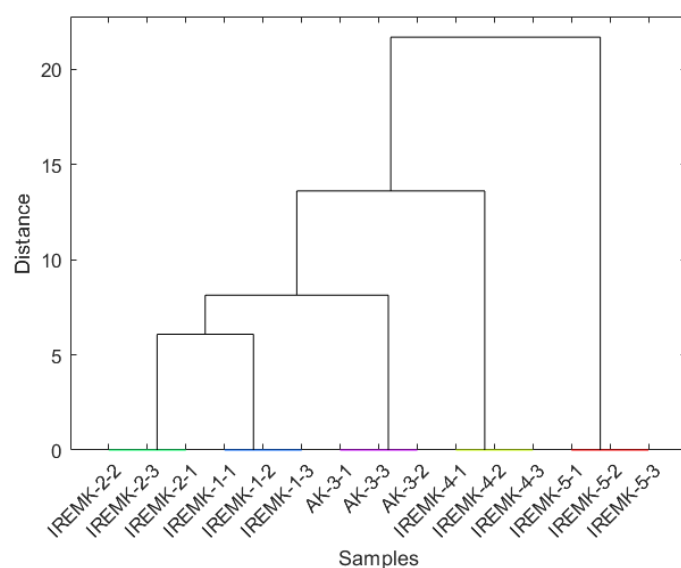

**Figure S4** Dendrogram obtained for the reduced feature set obtained on column set-up 3

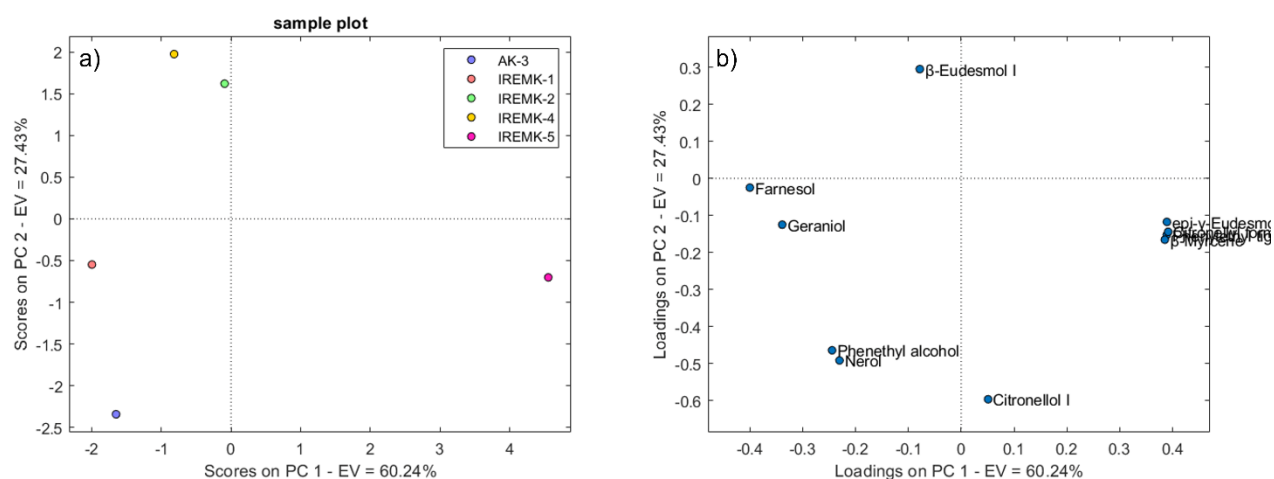

**Figure S5** PCA results - scores a) and loadings b) plots for 10 identified features with indication of discrimination between different essential oils on column set-up 2

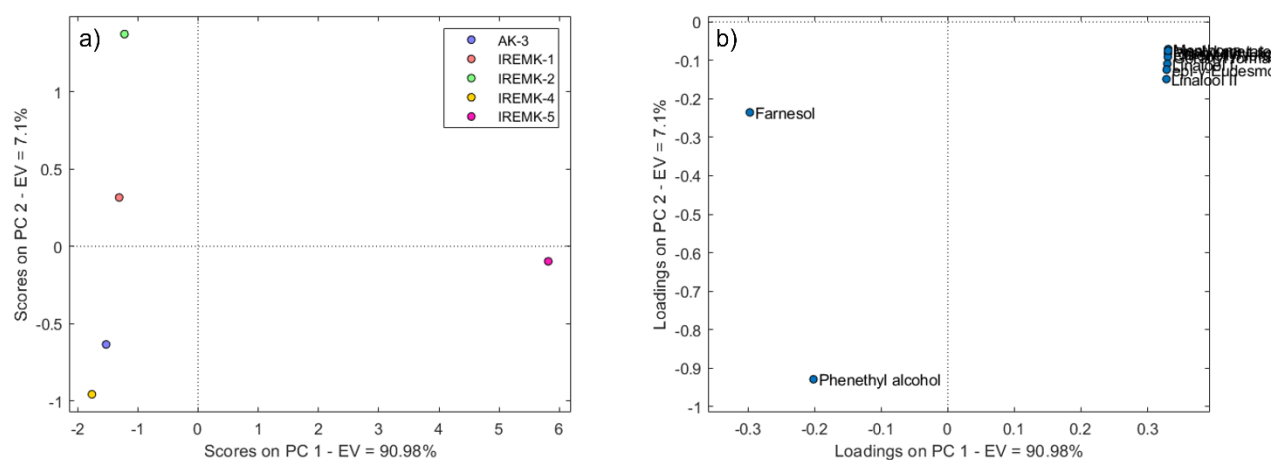

**Figure S6** PCA results - scores a) and loadings b) plots for 10 identified features with indication of discrimination between different essential oils on column set-up 3

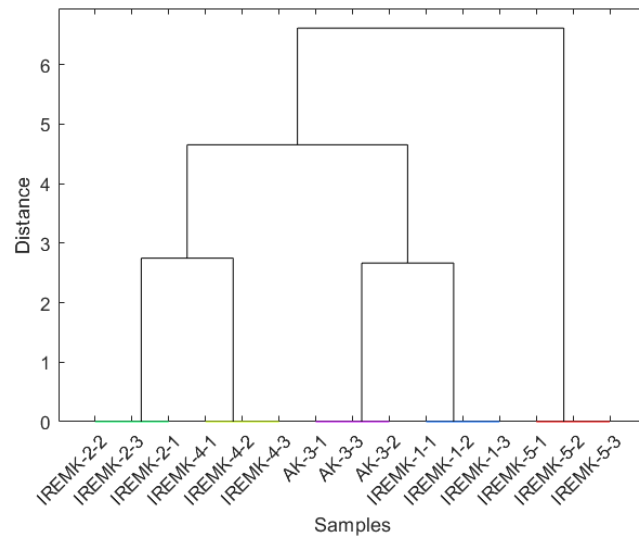

**Figure S7** Dendrogram obtained for the 100-feature set obtained on column set-up 2

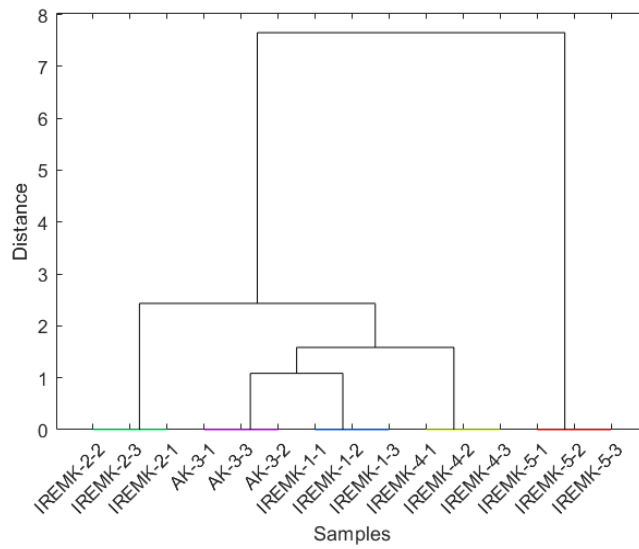

**Figure S8** Dendrogram obtained for the 100-feature set obtained on column set-up 3
